# Supplementary material
Source: PubMed Central journal article supplement (PMC8142668)

Supplemental Table 1. Sample Characteristics by Pittsburgh Fatigability Scale (PFS) Mental Score Severity Strata: The Long Life Family Study (N=2,361)

| Characteristics                              | Overall<br>N=2361        | PFS Mental Score Severity Strata*                       |                         |                          |                          |                          |                                                        |
|----------------------------------------------|--------------------------|---------------------------------------------------------|-------------------------|--------------------------|--------------------------|--------------------------|--------------------------------------------------------|
|                                              |                          | Least Severe<br>Fatigability<br>0-3<br>n=997<br>(42.2%) | 4-7<br>n=425<br>(18.0%) | 8-12<br>n=354<br>(15.0%) | 13-15<br>n=148<br>(6.3%) | 16-19<br>n=119<br>(5.0%) | Most Severe<br>Fatigability<br>≥20<br>n=318<br>(13.5%) |
| Age, years                                   | 73.6 ± 10.5 <sup>a</sup> | 71.2 ± 8.2                                              | 71.0 ± 7.9              | 72.3 ± 9.3               | 74.6 ± 11.0              | 75.6 ± 10.7              | 85.1 ± 12.9                                            |
| Sex, women                                   | 54.8 [1293]              | 52.9 [527]                                              | 56.0 [238]              | 53.4 [189]               | 46.6 [69]                | 56.3 [67]                | 63.8 [203]                                             |
| Education                                    |                          |                                                         |                         |                          |                          |                          |                                                        |
| High School or Less                          | 15.6 [368]               | 11.7 [117]                                              | 12.5 [53]               | 12.7 [45]                | 14.3 [21]                | 23.5 [28]                | 32.8 [104]                                             |
| >High School                                 | 84.4 [1990]              | 88.3 [879]                                              | 87.5 [372]              | 87.3 [309]               | 85.7 [126]               | 76.5 [91]                | 67.2 [213]                                             |
| Body mass index, kg/m <sup>2</sup>           | 27.4 ± 5.0               | 27.0 ± 4.6                                              | 27.6 ± 5.0              | 27.7 ± 5.2               | 28.1 ± 5.1               | 27.9 ± 5.6               | 27.5 ± 5.9                                             |
| Physical activity, MET-hrs/d <sup>b</sup>    | 36.4 ± 7.2               | 37.9 ± 7.0                                              | 37.3 ± 6.8              | 36.1 ± 6.7               | 36.0 ± 7.4               | 35.5 ± 6.5               | 31.4 ± 6.4                                             |
| Gait speed, m/s                              | 1.01 ± 0.28              | 1.08 ± 0.24                                             | 1.06 ± 0.23             | 1.04 ± 0.24              | 0.97 ± 0.25              | 0.95 ± 0.27              | 0.72 ± 0.31                                            |
| MMSE score, 0-30 <sup>c</sup>                | 28.5 ± 2.8               | 29.0 ± 1.7                                              | 29.0 ± 1.5              | 28.6 ± 2.5               | 28.5 ± 2.6               | 28.3 ± 2.2               | 25.8 ± 5.2                                             |
| Depressive symptomatology, 0-30 <sup>d</sup> | 3.3 ± 3.5                | 2.4 ± 2.8                                               | 2.8 ± 2.8               | 3.4 ± 3.4                | 3.8 ± 3.4                | 4.6 ± 3.9                | 5.9 ± 4.9                                              |

\*P-value for linear trend <.001 for all characteristics, except for sex and body mass index, accounting for family relatedness and adjusted for field center

<sup>a</sup>Mean ± standard deviation or % [n]; <sup>b</sup>Measured with the Framingham Physical Activity Index (MET=Metabolic Equivalent of Task);

<sup>c</sup>MMSE = Mini-Mental State Examination; <sup>d</sup>Measured using the Center for Epidemiologic Studies—Depression Scale (CES-D) score

Supplemental Table 2: Pittsburgh Fatigability Scale (PFS) Mental scores (range 0-50) across Age Strata and by Sex and by Education: The Long Life Family Study (N=2,361)

| PFS Mental scores* |                                 |                                    |                                 |                                      |                                   |
|--------------------|---------------------------------|------------------------------------|---------------------------------|--------------------------------------|-----------------------------------|
| Age Strata         | All<br>N=2361                   | Women<br>n=1293                    | Men<br>n=1068                   | High School or Less<br>n=368         | >High School<br>n=1993            |
| Overall            | 8.4 ± 9.6                       | 8.9 ± 10.0                         | 7.8 ± 9.0 <sup>a</sup>          | 12.9 ± 12.5                          | 7.6 ± 8.7 <sup>b</sup>            |
| 60-108 years       | 5 (1, 12) [2361]                | 6 (1, 13) [1293]                   | 5 (1, 12) [1068]                | 9 (2, 21) [368]                      | 5 (1, 11) [1993]                  |
| 60-69 years        | 5.9 ± 6.5<br>4 (1, 9) [1004]    | 6.1 ± 6.7<br>4 (1, 9) [573]        | 5.6 ± 6.1<br>4 (1, 9) [431]     | 6.3 ± 7.8<br>3 (0, 10) [74]          | 5.8 ± 6.3<br>4 (1, 9) [930]       |
| 70-79 years        | 6.8 ± 7.6<br>4.44 (1, 10) [839] | 6.8 ± 7.4<br>5 (1, 10) [423]       | 6.7 ± 7.7<br>4 (1, 10) [416]    | 8.4 ± 9.1<br>6 (1, 12) [114]         | 6.5 ± 7.3<br>4 (1, 10) [725]      |
| 80-89 years        | 11.6 ± 10.8<br>10 (2, 19) [253] | 12.6 ± 10.8<br>10 (2.22, 21) [139] | 10.3 ± 10.6<br>8 (1, 18) [114]  | 13.7 ± 12.1<br>12.22 (2.22, 20) [77] | 10.7 ± 10.0<br>8.50 (2, 18) [176] |
| 90-108 years       | 20.2 ± 13.6<br>21 (9, 32) [265] | 21.7 ± 13.5<br>23 (11, 32) [158]   | 18.0 ± 13.5<br>16 (6, 30) [107] | 21.9 ± 13.6<br>23 (11, 33) [103]     | 19.2 ± 13.6<br>20 (7, 30) [162]   |
| P-value trend**    | <.0001                          | <.0001                             | <.0001                          | <.0001                               | <.0001                            |

\*Mean ± SD

Median (25<sup>th</sup>, 75<sup>th</sup> percentile), range, [sample size]

\*\*Accounting for family relatedness and adjusted for field center

<sup>a</sup>P-values for mean differences in PFS Mental scores by sex within each age strata: p=.08 for overall; p=.49 for 60-69 years; p=.48 for 70-79 years; p=.05 for 80-89 years; and p=.03 for 90-108 years

<sup>b</sup>P-values for mean differences in PFS Mental score by education within each age strata: p=.005 for overall; p=.70 for 60-69 years; p=.07 for 70-79 years; p=.06 for 80-89 years; and p=.13 for 90-108 years

Supplemental Figure 1. Distribution of Pittsburgh Fatigability Scale (PFS) Mental scores: The Long Life Family Study (N=2,361)

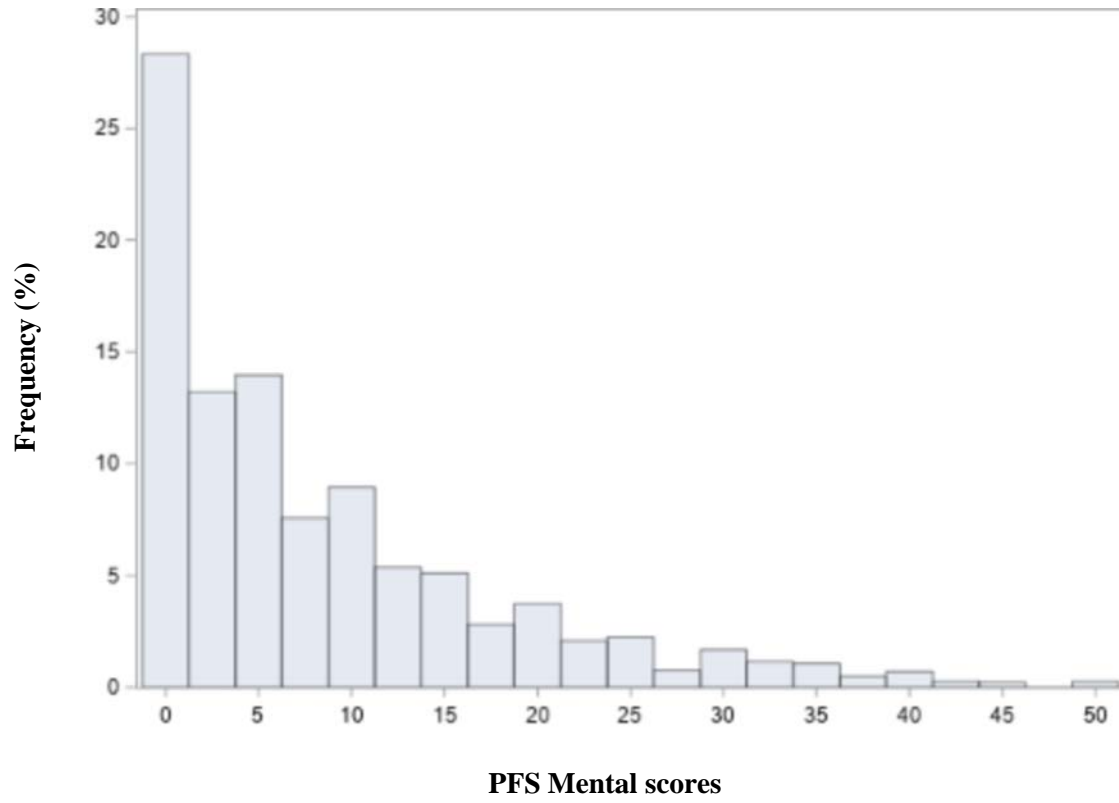

Supplement: NIHMS1693794-supplement-suppl.pdf [file NIHMS1693794-supplement-suppl.pdf]
